# Supplementary material for: Graphene/C2N lateral heterostructures as promising anode materials for lithium-ion batteries
Source: Royal Society of Chemistry journal article supplement (doi:10.1039/d3cp03295g), 2023-01-01
Supplement: d3cp03295g1.pdf [file d3cp03295g1.pdf]

**Supporting information:**

**Graphene/C<sub>2</sub>N lateral heterostructures as promising anode materials in lithium-ion batteries**

Yawen Chen, Qianru Wang, Quan Zhang, Shengli Zhang, Yang Zhang\*

*Ministry of Education Key Laboratory for Nonequilibrium Synthesis and Modulation of Condensed Matter, School of Physics, Xi'an Jiaotong University, Xi'an 710049, China*

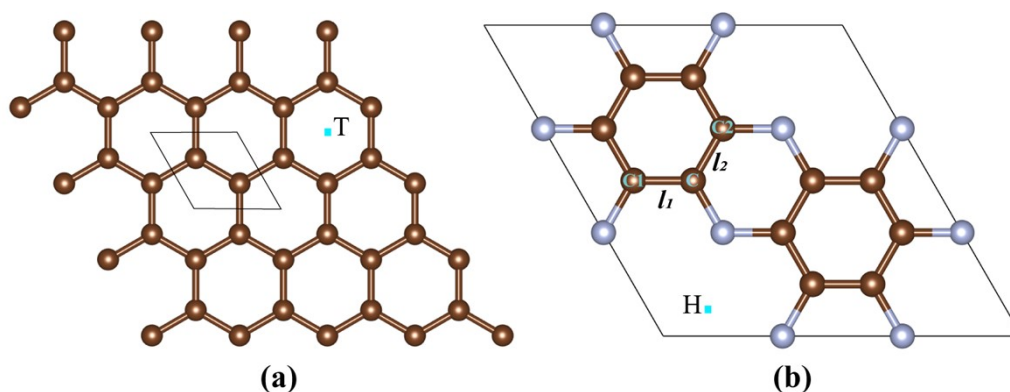

**Fig. S1** Geometrical structures of (a) graphene and (b) C<sub>2</sub>N monolayers. Brown and gray balls represent C and N atoms. T and H denote the stable sites for Li atom adsorption.

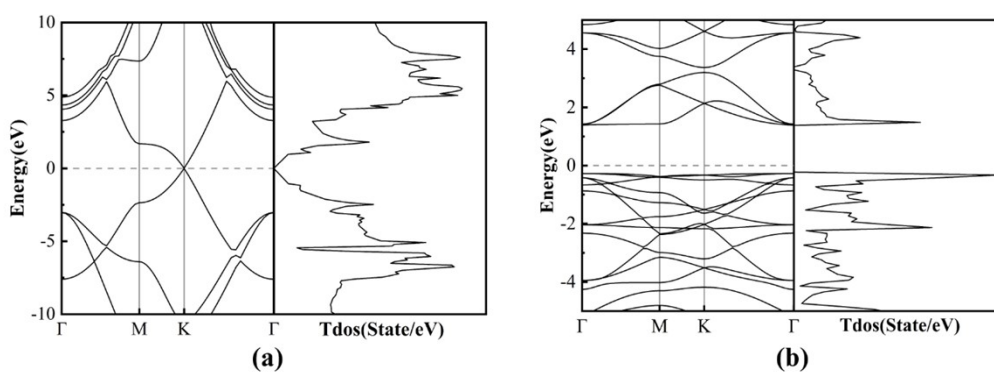

**Fig. S2** Band structures and density of states (DOSs) of (a) graphene and (b) C<sub>2</sub>N monolayers.

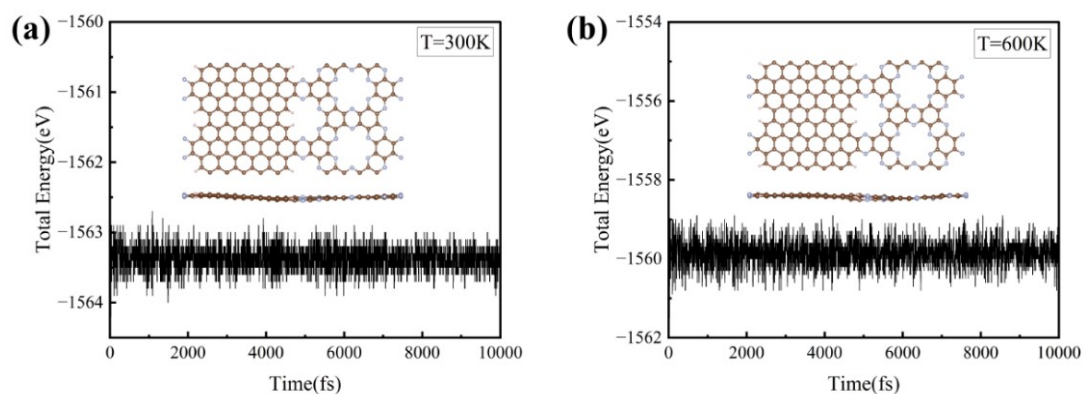

**Fig. S3** Molecular dynamics simulation of model (11, 26) at (a) 300 K and (b) 600 K. The final snapshots of (11, 26) G/C<sub>2</sub>N-LH viewed from different directions are displayed.

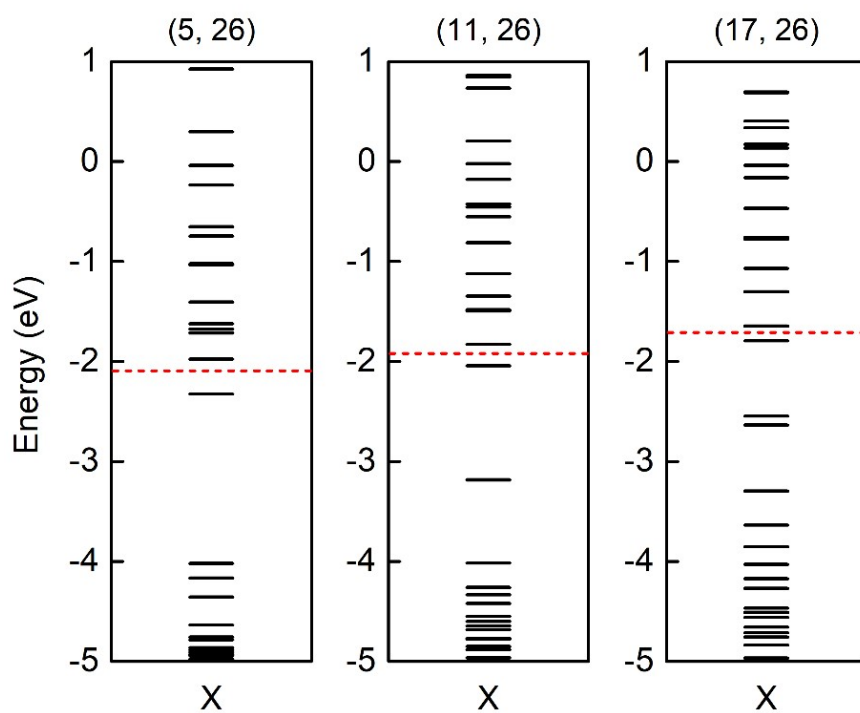

**Fig. S4.** Calculated energy eigenvalues for (5, 26), (11, 26), and (17, 26) G/C<sub>2</sub>N-LHs at the X point using the HSE06 method. The Fermi level is denoted by the red dashed line.

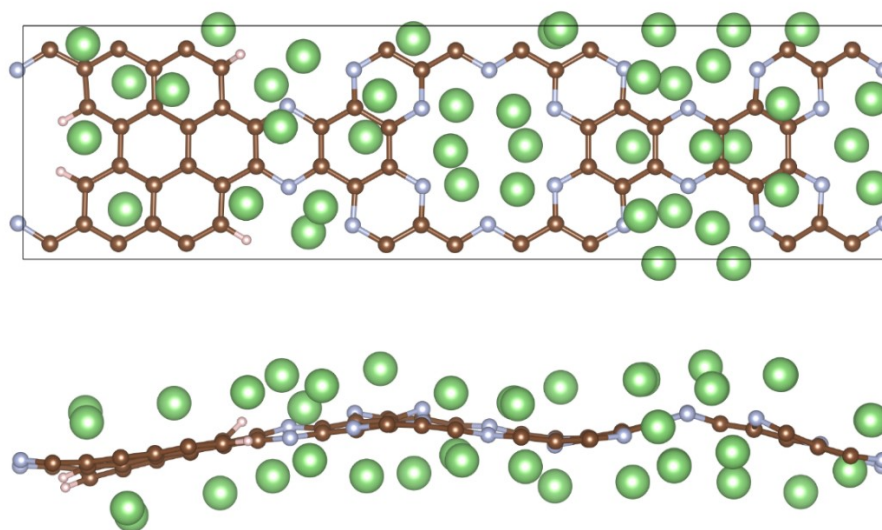

**Fig. S5** Stable structure of model (5,26) after adsorption of 40 Li atoms. Brown, gray, green and pink balls represent C, N, Li and H atoms, respectively.

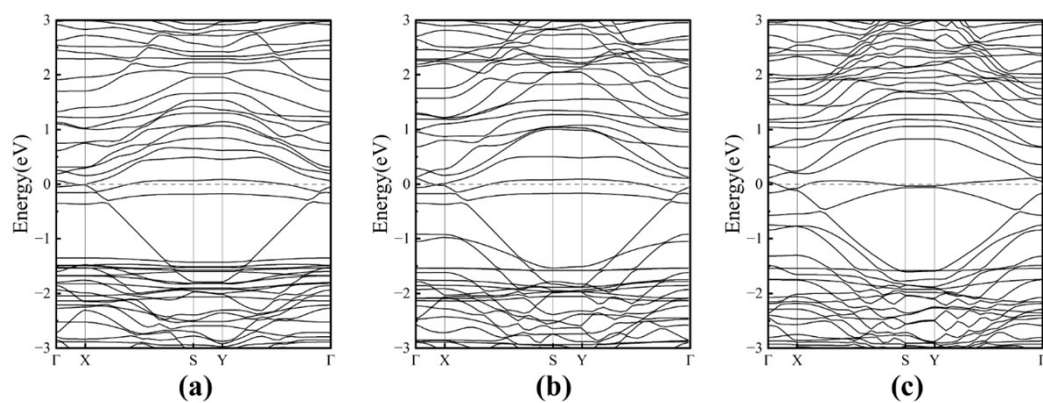

**Fig. S6** Band structures of G/C<sub>2</sub>N-LHs after adsorbing a lithium atom at a stable site: (a) (5,26), (b) (11, 26) and (c) (17, 26).

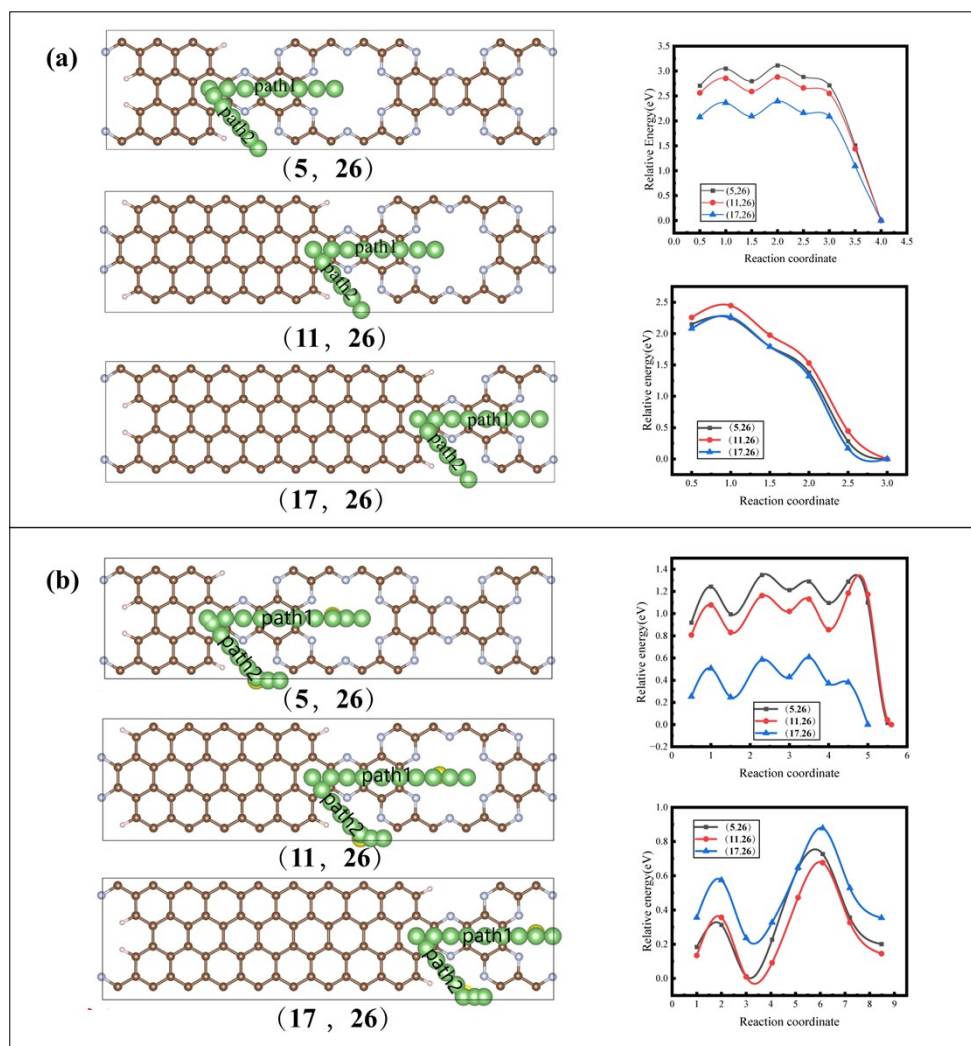

**Fig. S7** Diffusion pathways and energy barrier for Li atom migrating on (a) bare G/C<sub>2</sub>N-LHs and (b) one Li atom-adsorbed G/C<sub>2</sub>N-LHs. Brown, gray, and pink balls represent C, N, and H atoms, respectively. Green balls represent lithium atoms in the diffusion process, and yellow balls represent a lithium atom attached to G/C<sub>2</sub>N-LHs.
